# Supplementary material for: Improving the performance of PEDOT-PSS coated sulfur@activated porous graphene composite cathodes for lithium–sulfur batteries
Source: Royal Society of Chemistry journal article supplement (doi:10.1039/c4ta03366c), 2014-01-01
Supplement: c4ta03366c1.pdf [file c4ta03366c1.pdf]

**Electronic Supplementary Information for**

**Improving the performance of PEDOT-PSS coated**

**sulfur@activated porous graphene composite cathodes for**

**lithium-sulfur batteries**

Han Li, Minqiang Sun, Tao Zhang, Yuqian Fang and Gengchao Wang\*

*Key Laboratory for Ultrafine Materials of Ministry of Education, School of Materials Science and Engineering, Shanghai Key Laboratory of Advanced Polymeric Materials, East China University of Science and Technology, Shanghai 200237, P.R.China*

\*Email: [gengchaow@ecust.edu.cn](mailto:gengchaow@ecust.edu.cn)

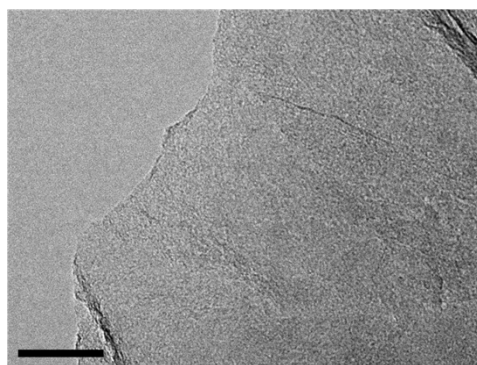

**Fig. S1** FE-SEM image of EG with high magnification (scale bars: 50 nm).

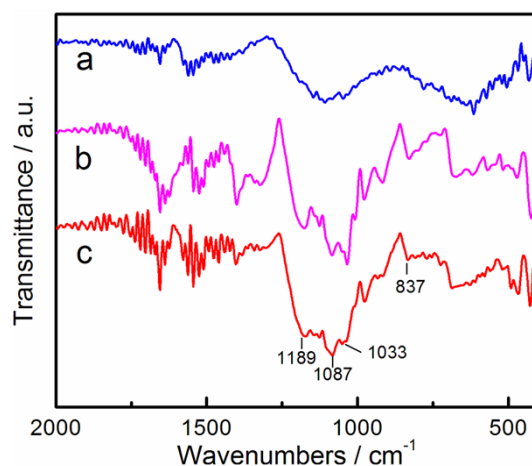

**Fig. S2** FTIR spectra of (a) S@aPG, (b) PEDOT-PSS and (c) PEDOT/S@aPG.

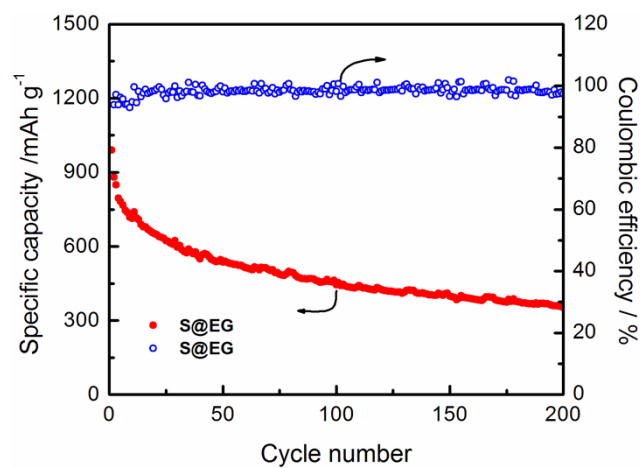

**Fig. S3** Cycling performance and coulombic efficiency of S@EG.

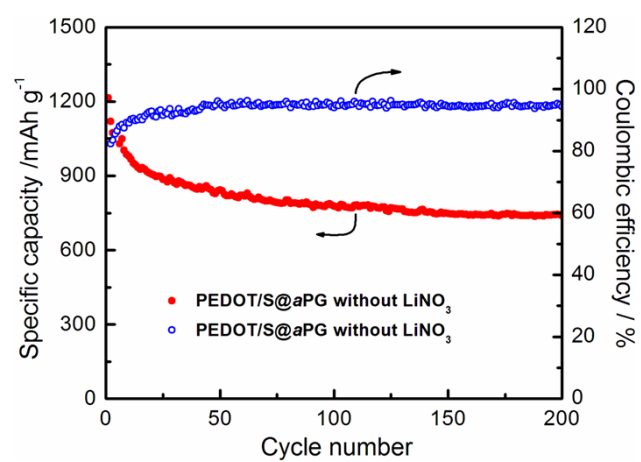

**Fig. S4** Cycling performance and coulombic efficiency of PEDOT/S@aPG without  $\text{LiNO}_3$ .
